# Supplementary material for: Inventory Management in Humanitarian Operations: Impact of Amount, Schedule, and Uncertainty in Funding
Source: Atypon-hosted journal article supplement (doi:10.1287/msom.2014.0497), 2014-08-28
Supplement: msom.2014.0497-sm-imho_appendix.pdf [file msom.2014.0497-sm-imho_appendix.pdf]

# Online Appendix to Inventory Management in Humanitarian Operations: Impact of Amount, Schedule, and Uncertainty in Funding

LEMMA 1.  $G_t^\lambda(x_t, w_t^0, w_t^1, \dots, w_t^{\lambda-1}, R_t, OF_t)$  is jointly convex in  $x_t, w_t^0, w_t^1, \dots, w_t^{\lambda-1}$  for fixed  $R_t$  and  $OF_t$ .

## Proof

The proof proceeds through induction on the number of periods to go. We know that  $G_0^\lambda(\cdot) = 0 \forall (x_0, w_0^0, \dots, w_0^{\lambda-1}, R_0, 0)$ . For  $t \leq \lambda$ , no new orders will be placed in period  $t$  since the order will not be received before the end of the horizon. Therefore, for  $t \leq \lambda$ , it follows that for every  $(R_t, OF_t)$ ,

$$\begin{aligned} & G_t^\lambda(x_t, w_t^0, \dots, w_t^{\lambda-1}, R_t, OF_t) \\ &= \tilde{f}_t(x_t + w_t^0) + \mathbf{E}_{\zeta_t} \tilde{f}_{t-1}(x_t + w_t^0 + w_t^1 - \zeta_t) + \dots + \mathbf{E}_{\zeta_t, \dots, \zeta_2} \tilde{f}_1(x_t + w_t^0 + \dots + w_t^{\lambda-1} - \zeta_t - \zeta_{t-1} - \dots - \zeta_2) \end{aligned} \quad (10)$$

where  $\tilde{f}_i(x) = h\mathbf{E}_{\zeta_i}[x - \zeta_i]^+ + b\mathbf{E}_{\zeta_i}[\zeta_i - x]^+$ . From equation (10), it follows directly that  $G_t^\lambda$  is jointly convex in  $x_t, w_t^0, \dots, w_t^{\lambda-1}$  for every  $t \leq \lambda$ . Now,

$$\begin{aligned} & G_{\lambda+1}^\lambda(x_{\lambda+1}, w_{\lambda+1}^0, \dots, w_{\lambda+1}^{\lambda-1}, R_{\lambda+1}, OF_{\lambda+1}) \\ &= \min_{0 \leq z_{\lambda+1} \leq \frac{R_{\lambda+1}}{c} - IP_{\lambda+1}} \left\{ cz_{\lambda+1} + b\mathbf{E}_{\zeta_{\lambda+1}}[\zeta_{\lambda+1} - x_{\lambda+1} - w_{\lambda+1}^0]^+ + h\mathbf{E}_{\zeta_{\lambda+1}}[x_{\lambda+1} + w_{\lambda+1}^0 - \zeta_{\lambda+1}]^+ \right. \\ & \quad \left. + \mathbf{E}_{OF_\lambda | OF_{\lambda+1}} \mathbf{E}_{\zeta_{\lambda+1}} G_\lambda^\lambda(x_{\lambda+1} + w_{\lambda+1}^0 - \zeta_{\lambda+1}, \dots, w_{\lambda+1}^{\lambda-1}, z_{\lambda+1}, R_{\lambda+1} - c z_{\lambda+1} + OF_{\lambda+1} - OF_\lambda, OF_\lambda) \right\} \end{aligned} \quad (11)$$

From the convexity of  $G_\lambda^\lambda$  in  $x_\lambda, w_\lambda^0, \dots, w_\lambda^{\lambda-1}$ , it follows that for fixed  $(R_{\lambda+1}, OF_{\lambda+1})$ , the function to be minimized in expression (11) is jointly convex in  $x_{\lambda+1}, w_{\lambda+1}^0, \dots, w_{\lambda+1}^{\lambda-1}$  and  $z_{\lambda+1}$ . Now notice that for fixed  $R_{\lambda+1}$ ,  $C = \{(x_{\lambda+1}, w_{\lambda+1}^0, \dots, w_{\lambda+1}^{\lambda-1}, z_{\lambda+1}) : 0 \leq z_{\lambda+1} \leq \frac{R_{\lambda+1}}{c} - IP_{\lambda+1}\}$  is a convex set. Then using proposition B-4 from Heyman and Sobel (1984), we see that  $G_{\lambda+1}^\lambda$  is jointly convex in  $x_{\lambda+1}, w_{\lambda+1}^0, \dots, w_{\lambda+1}^{\lambda-1}$  for fixed  $(R_{\lambda+1}, OF_{\lambda+1})$ .

If we let the induction hypothesis be that  $G_t^\lambda$  is jointly convex in  $x_t, w_t^0, \dots, w_t^{\lambda-1}$  for any given  $t$  and fixed  $(R_t, OF_t)$ , then using an argument identical to the one following expression (11), we can show that  $G_{t+1}^\lambda$  is jointly convex in  $x_{t+1}, w_{t+1}^0, \dots, w_{t+1}^{\lambda-1}$  for fixed  $(R_{t+1}, OF_{t+1})$ . This completes the induction.

## Proof of Theorem 1

The proof proceeds through induction on the number of periods to go. We know that  $NV_0^\lambda(\cdot) = G_0^\lambda(\cdot) = 0$ . For  $t \leq \lambda$ , orders placed in period  $t$  will not be received before the end of the horizon and hence, no orders will be placed during those periods. Therefore, on-hand or future funding inflows become irrelevant and hence, for every  $(R_t, OF_t)$ ,  $G_t^\lambda(x_t, w_t^0, w_t^1, \dots, w_t^{\lambda-1}, R_t, OF_t) = NV_t^\lambda(x_t, w_t^0, w_t^1, \dots, w_t^{\lambda-1}) \forall t \leq \lambda$ . Then, from expression (10), it follows that  $NV_t^\lambda$  is jointly convex in  $x_t, w_t^0, w_t^1, \dots, w_t^{\lambda-1} \forall t \leq \lambda$ . Now,

$$NV_{\lambda+1}^\lambda(x_{\lambda+1}, w_{\lambda+1}^0, \dots, w_{\lambda+1}^{\lambda-1}) = \min_{z_{\lambda+1} \geq 0} \left\{ cz_{\lambda+1} + b\mathbf{E}_{\zeta_{\lambda+1}}[\zeta_{\lambda+1} - x_{\lambda+1} - w_{\lambda+1}^0]^+ + h\mathbf{E}_{\zeta_{\lambda+1}}[x_{\lambda+1} + w_{\lambda+1}^0 - \zeta_{\lambda+1}]^+ \right. \\ \left. + \mathbf{E}_{\zeta_{\lambda+1}} NV_\lambda^\lambda(x_{\lambda+1} + w_{\lambda+1}^0 - \zeta_{\lambda+1}, w_{\lambda+1}^1, \dots, w_{\lambda+1}^{\lambda-1}, z_{\lambda+1}) \right\} \quad (12)$$

From the convexity of  $NV_\lambda^\lambda$ , we have that the expression to be minimized in equation (12) is jointly convex in  $x_{\lambda+1}, w_{\lambda+1}^0, \dots, w_{\lambda+1}^{\lambda-1}$  and  $z_{\lambda+1}$ . Two important results follow: (i)  $NV_{\lambda+1}^\lambda$  is jointly convex in  $x_{\lambda+1}, w_{\lambda+1}^0, \dots, w_{\lambda+1}^{\lambda-1}$ . (ii) The specific form of equation (10) implies that there exists a base stock level  $y_{\lambda+1}^*$ ,

independent of  $x_{\lambda+1}, w_{\lambda+1}^0, \dots, w_{\lambda+1}^{\lambda-1}$ , such that  $z_{\lambda+1}^* = \max(y_{\lambda+1}^* - IP_{\lambda+1}, 0)$  minimizes (12). In general, we can show through induction that  $NV_t^\lambda$  is jointly convex in  $x_t, w_t^0, \dots, w_t^{\lambda-1}$  and that there exists a base stock level  $y_t^*$ , independent of  $x_t, w_t^0, \dots, w_t^{\lambda-1}$ , such that  $z_t^* = \max(y_t^* - IP_t, 0)$  is the optimal order quantity in period  $t$ .

$$\begin{aligned} & \text{Now, } G_{\lambda+1}^\lambda(x_{\lambda+1}, w_{\lambda+1}^0, \dots, w_{\lambda+1}^{\lambda-1}, R_{\lambda+1}, OF_{\lambda+1}) \\ &= \min_{0 \leq z_{\lambda+1} \leq \frac{R_{\lambda+1}}{c} - IP_{\lambda+1}} \left\{ cz_{\lambda+1} + b\mathbf{E}_{\zeta_{\lambda+1}}[\zeta_{\lambda+1} - x_{\lambda+1} - w_{\lambda+1}^0]^+ + h\mathbf{E}_{\zeta_{\lambda+1}}[x_{\lambda+1} + w_{\lambda+1}^0 - \zeta_{\lambda+1}]^+ \right. \\ & \quad \left. + \mathbf{E}_{OF_\lambda | OF_{\lambda+1}} \mathbf{E}_{\zeta_{\lambda+1}} G_\lambda^\lambda(x_{\lambda+1} + w_{\lambda+1}^0 - \zeta_{\lambda+1}, \dots, w_{\lambda+1}^{\lambda-1}, z_{\lambda+1}, R_{\lambda+1} - c\zeta_{\lambda+1} + OF_{\lambda+1} - OF_\lambda, OF_\lambda) \right\} \\ &= \min_{0 \leq z_{\lambda+1} \leq \frac{R_{\lambda+1}}{c} - IP_{\lambda+1}} \left\{ cz_{\lambda+1} + b\mathbf{E}_{\zeta_{\lambda+1}}[\zeta_{\lambda+1} - x_{\lambda+1} - w_{\lambda+1}^0]^+ + h\mathbf{E}_{\zeta_{\lambda+1}}[x_{\lambda+1} + w_{\lambda+1}^0 - \zeta_{\lambda+1}]^+ \right\} \quad (13) \\ & \quad \left. + \mathbf{E}_{\zeta_{\lambda+1}} NV_\lambda^\lambda(x_{\lambda+1} + w_{\lambda+1}^0 - \zeta_{\lambda+1}, w_{\lambda+1}^1, \dots, w_{\lambda+1}^{\lambda-1}, z_{\lambda+1}) \right\} \end{aligned}$$

where the second equality follows from the fact that  $NV_\lambda^\lambda(\cdot) = G_\lambda^\lambda(\cdot, R_\lambda, OF_\lambda) \forall (R_\lambda, OF_\lambda)$ . The expressions to be minimized in (12) and (13) are the same, implying that  $z_{\lambda+1}^* = \max(\min(y_{\lambda+1}^* - IP_{\lambda+1}, \frac{R_{\lambda+1}}{c} - IP_{\lambda+1}), 0)$  minimizes equation (13).

Now consider the following cases.

Case 1.1:  $IP_{\lambda+1} \geq y_{\lambda+1}^*$

$$\begin{aligned} NV_{\lambda+1}^\lambda(x_{\lambda+1}, w_{\lambda+1}^0, \dots, w_{\lambda+1}^{\lambda-1}) &= G_{\lambda+1}^\lambda(x_{\lambda+1}, w_{\lambda+1}^0, \dots, w_{\lambda+1}^{\lambda-1}, R_{\lambda+1}, OF_{\lambda+1}) \\ &= h\mathbf{E}_{\zeta_{\lambda+1}}[x_{\lambda+1} + w_{\lambda+1}^0 - \zeta_{\lambda+1}]^+ + b\mathbf{E}_{\zeta_{\lambda+1}}[\zeta_{\lambda+1} - x_{\lambda+1} - w_{\lambda+1}^0]^+ + \mathbf{E}_{\zeta_{\lambda+1}} NV_\lambda^\lambda(x_{\lambda+1} + w_{\lambda+1}^0 - \zeta_{\lambda+1}, w_{\lambda+1}^1, \dots, w_{\lambda+1}^{\lambda-1}, 0) \end{aligned}$$

where we have again used the fact that  $NV_\lambda^\lambda(\cdot) = G_\lambda^\lambda(\cdot, R_\lambda, OF_\lambda)$ .

Case 1.2:  $IP_{\lambda+1} < y_{\lambda+1}^*$ ,  $\frac{R_{\lambda+1}}{c} \geq y_{\lambda+1}^*$

$$\begin{aligned} NV_{\lambda+1}^\lambda(x_{\lambda+1}, w_{\lambda+1}^0, \dots, w_{\lambda+1}^{\lambda-1}) &= G_{\lambda+1}^\lambda(x_{\lambda+1}, w_{\lambda+1}^0, \dots, w_{\lambda+1}^{\lambda-1}, R_{\lambda+1}, OF_{\lambda+1}) = h\mathbf{E}_{\zeta_{\lambda+1}}[x_{\lambda+1} + w_{\lambda+1}^0 - \zeta_{\lambda+1}]^+ \\ & \quad + b\mathbf{E}_{\zeta_{\lambda+1}}[\zeta_{\lambda+1} - x_{\lambda+1} - w_{\lambda+1}^0]^+ + c(y_{\lambda+1}^* - IP_{\lambda+1}) + \mathbf{E}_{\zeta_{\lambda+1}} NV_\lambda^\lambda(x_{\lambda+1} + w_{\lambda+1}^0 - \zeta_{\lambda+1}, w_{\lambda+1}^1, \dots, w_{\lambda+1}^{\lambda-1}, y_{\lambda+1}^* - IP_{\lambda+1}) \end{aligned}$$

In cases 1.1 and 1.2,  $NV_{\lambda+1}^\lambda(\cdot) = G_{\lambda+1}^\lambda(\cdot, R_{\lambda+1}, OF_{\lambda+1})$ . Therefore,  $\frac{\partial NV_{\lambda+1}^\lambda}{\partial x_{\lambda+1}} = \frac{\partial G_{\lambda+1}^\lambda}{\partial x_{\lambda+1}}$  and  $\frac{\partial NV_{\lambda+1}^\lambda}{\partial w_{\lambda+1}^i} = \frac{\partial G_{\lambda+1}^\lambda}{\partial w_{\lambda+1}^i}$ ,  $i = 0, 1, \dots, \lambda - 1$ .

Case 1.3:  $\frac{R_{\lambda+1}}{c} < y_{\lambda+1}^*$

$$\begin{aligned} NV_{\lambda+1}^\lambda(x_{\lambda+1}, w_{\lambda+1}^0, \dots, w_{\lambda+1}^{\lambda-1}) &= h\mathbf{E}_{\zeta_{\lambda+1}}[x_{\lambda+1} + w_{\lambda+1}^0 - \zeta_{\lambda+1}]^+ + b\mathbf{E}_{\zeta_{\lambda+1}}[\zeta_{\lambda+1} - x_{\lambda+1} - w_{\lambda+1}^0]^+ + c(y_{\lambda+1}^* - IP_{\lambda+1}) \\ & \quad + \mathbf{E}_{\zeta_{\lambda+1}} NV_\lambda^\lambda(x_{\lambda+1} + w_{\lambda+1}^0 - \zeta_{\lambda+1}, w_{\lambda+1}^1, \dots, w_{\lambda+1}^{\lambda-1}, y_{\lambda+1}^* - IP_{\lambda+1}) \\ G_{\lambda+1}^\lambda(x_{\lambda+1}, w_{\lambda+1}^0, \dots, w_{\lambda+1}^{\lambda-1}, R_{\lambda+1}, OF_{\lambda+1}) &= h\mathbf{E}_{\zeta_{\lambda+1}}[x_{\lambda+1} + w_{\lambda+1}^0 - \zeta_{\lambda+1}]^+ + b\mathbf{E}_{\zeta_{\lambda+1}}[\zeta_{\lambda+1} - x_{\lambda+1} - w_{\lambda+1}^0]^+ + R_{\lambda+1} - cIP_{\lambda+1} \\ & \quad + \mathbf{E}_{\zeta_{\lambda+1}} NV_\lambda^\lambda(x_{\lambda+1} + w_{\lambda+1}^0 - \zeta_{\lambda+1}, w_{\lambda+1}^1, \dots, w_{\lambda+1}^{\lambda-1}, \frac{R_{\lambda+1}}{c} - IP_{\lambda+1}) \end{aligned}$$

Using expression (10), we see that

$$\begin{aligned} \frac{\partial NV_{\lambda+1}^\lambda}{\partial x_{\lambda+1}} &= \frac{\partial NV_{\lambda+1}^\lambda}{\partial w_{\lambda+1}^0} = -c + hF_{\lambda+1}(x_{\lambda+1} + w_{\lambda+1}^0) - b\bar{F}_{\lambda+1}(x_{\lambda+1} + w_{\lambda+1}^0) + \mathbf{E}_{\zeta_{\lambda+1}} \frac{\partial \tilde{f}_\lambda(x_{\lambda+1} + w_{\lambda+1}^0 + w_{\lambda+1}^1 - \zeta_{\lambda+1})}{\partial x_{\lambda+1}} \\ & \quad + \dots + \mathbf{E}_{\zeta_{\lambda+1}, \dots, \zeta_2} \frac{\partial \tilde{f}_1(y_{\lambda+1}^* - \zeta_{\lambda+1} - \dots - \zeta_2)}{\partial x_{\lambda+1}} \end{aligned}$$

and

$$\frac{\partial G_{\lambda+1}^\lambda}{\partial x_{\lambda+1}} = \frac{\partial G_{\lambda+1}^\lambda}{\partial w_{\lambda+1}^0} = -c + hF_{\lambda+1}(x_{\lambda+1} + w_{\lambda+1}^0) - b\bar{F}_{\lambda+1}(x_{\lambda+1} + w_{\lambda+1}^0) + \mathbf{E}_{\zeta_{\lambda+1}} \frac{\partial \tilde{f}_\lambda(x_{\lambda+1} + w_{\lambda+1}^0 + w_{\lambda+1}^1 - \zeta_{\lambda+1})}{\partial x_{\lambda+1}}$$

$$+ \dots + \mathbf{E}_{\zeta_{\lambda+1}, \dots, \zeta_2} \frac{\partial \tilde{f}_1(\frac{R_{\lambda+1}}{c} - \zeta_{\lambda+1} - \dots - \zeta_2)}{\partial x_{\lambda+1}}$$

For fixed  $R_{\lambda+1}$ , the last term is 0 in both the above equations. Therefore  $\frac{\partial NV_{\lambda+1}^\lambda(\cdot)}{\partial x_{\lambda+1}} = \frac{\partial NV_{\lambda+1}^\lambda(\cdot)}{\partial w_{\lambda+1}^0} = \frac{\partial G_{\lambda+1}^\lambda(\cdot, R_{\lambda+1}, OF_{\lambda+1})}{\partial x_{\lambda+1}}$   
 $= \frac{\partial G_{\lambda+1}^\lambda(\cdot, R_{\lambda+1}, OF_{\lambda+1})}{\partial w_{\lambda+1}^0}$ . Similarly,

$$\frac{\partial NV_{\lambda+1}^\lambda}{\partial w_{\lambda+1}^1} = -c + \mathbf{E}_{\zeta_{\lambda+1}} \frac{\partial \tilde{f}_\lambda(x_{\lambda+1} + w_{\lambda+1}^0 + w_{\lambda+1}^1 - \zeta_{\lambda+1})}{\partial w_{\lambda+1}^1} + \dots + \mathbf{E}_{\zeta_{\lambda+1}, \dots, \zeta_2} \frac{\partial \tilde{f}_1(y_{\lambda+1}^* - \zeta_{\lambda+1} - \dots - \zeta_2)}{\partial w_{\lambda+1}^1}$$

and

$$\frac{\partial G_{\lambda+1}^\lambda}{\partial w_{\lambda+1}^1} = -c + \mathbf{E}_{\zeta_{\lambda+1}} \frac{\partial \tilde{f}_\lambda(x_{\lambda+1} + w_{\lambda+1}^0 + w_{\lambda+1}^1 - \zeta_{\lambda+1})}{\partial w_{\lambda+1}^1} + \dots + \mathbf{E}_{\zeta_{\lambda+1}, \dots, \zeta_2} \frac{\partial \tilde{f}_1(\frac{R_{\lambda+1}}{c} - \zeta_{\lambda+1} - \dots - \zeta_2)}{\partial w_{\lambda+1}^1}$$

Again, for fixed  $R_{\lambda+1}$ , the last term is 0 in both the above equations. Therefore,  $\frac{\partial NV_{\lambda+1}^\lambda(\cdot)}{\partial w_{\lambda+1}^1} = \frac{\partial G_{\lambda+1}^\lambda(\cdot, R_{\lambda+1}, OF_{\lambda+1})}{\partial w_{\lambda+1}^1}$ .  
 For any given  $(R_{\lambda+1}, OF_{\lambda+1})$ , following similar steps, it is easy to show that  $\frac{\partial NV_{\lambda+1}^\lambda(\cdot)}{\partial w_{\lambda+1}^i} = \frac{\partial G_{\lambda+1}^\lambda(\cdot, R_{\lambda+1}, OF_{\lambda+1})}{\partial w_{\lambda+1}^i}$   
 $\forall i = 1, \dots, \lambda - 1$ .

Let the induction hypothesis be that  $\frac{\partial NV_t^\lambda(\cdot)}{\partial x_t} = \frac{\partial G_t^\lambda(\cdot, R_t, OF_t)}{\partial x_t}$  and  $\frac{\partial NV_t^\lambda(\cdot)}{\partial w_t^i} = \frac{\partial G_t^\lambda(\cdot, R_t, OF_t)}{\partial w_t^i}$  for any given  $(R_t, OF_t)$  and  $i = 0, 1, \dots, \lambda - 1$ . We will show that they hold true for  $t + 1$  as well. We know that

$$G_{t+1}^\lambda(x_{t+1}, w_{t+1}^0, \dots, w_{t+1}^{\lambda-1}, R_{t+1}, OF_{t+1}) \\ = \min_{0 \leq z_{t+1} \leq \frac{R_{t+1}}{c} - IP_{t+1}} \left\{ cz_{t+1} + b\mathbf{E}_{\zeta_{t+1}} [\zeta_{t+1} - x_{t+1} - w_{t+1}^0]^+ + h\mathbf{E}_{\zeta_{t+1}} [x_{t+1} + w_{t+1}^0 - \zeta_{t+1}]^+ \right. \\ \left. + \mathbf{E}_{OF_t | OF_{t+1}} \mathbf{E}_{\zeta_{t+1}} G_t^\lambda(x_{t+1} + w_{t+1}^0 - \zeta_{t+1}, \dots, w_{t+1}^{\lambda-1}, z_{t+1}, R_{t+1} - c\zeta_{t+1} + OF_{t+1} - OF_t, OF_t) \right\} \quad (14)$$

From the convexity of  $G_t^\lambda$  and the induction assumptions  $\frac{\partial NV_t^\lambda}{\partial x_t} = \frac{\partial G_t^\lambda}{\partial x_t}$  and  $\frac{\partial NV_t^\lambda}{\partial w_t^i} = \frac{\partial G_t^\lambda}{\partial w_t^i}$ , it follows that  $z_{t+1}^* = \max(\min(y_{t+1}^* - IP_{t+1}, \frac{R_{t+1}}{c} - IP_{t+1}), 0)$  minimizes equation (14).

To prove the induction for  $t+1$ , the following recursive equation for  $NV_t^\lambda$ ,  $t > \lambda + 1$ , would be useful.

$$NV_t^\lambda(x_{t+1} + w_{t+1}^0 - \zeta_{t+1}, w_{t+1}^1, \dots, w_{t+1}^{\lambda-1}, z_{t+1}) = c(\max(y_t^* - IP_t, 0)) + \tilde{f}_t(x_{t+1} + w_{t+1}^0 + w_{t+1}^1 - \zeta_{t+1}) \\ + \mathbf{E}_{\zeta_t} \tilde{f}_{t-1}(x_{t+1} + w_{t+1}^0 + w_{t+1}^1 + w_{t+1}^2 - \zeta_{t+1} - \zeta_t) + \dots + \mathbf{E}_{\zeta_t, \dots, \zeta_{t-\lambda+2}} \tilde{f}_{t-\lambda+1}(IP_{t+1} + z_{t+1} - \zeta_{t+1} - \zeta_t - \dots - \zeta_{t-\lambda+2}) \\ + \mathbf{E}_{\zeta_t, \dots, \zeta_{t-\lambda+1}} NV_{t-\lambda}^\lambda(x_{t-\lambda}, w_{t-\lambda}^0, \dots, w_{t-\lambda}^{\lambda-1}) \quad (15)$$

Now consider three cases similar to the ones we considered earlier for  $t = \lambda + 1$ .

Case 2.1:  $IP_{t+1} \geq y_{t+1}^*$ .

$$G_{t+1}^\lambda(x_{t+1}, w_{t+1}^0, \dots, w_{t+1}^{\lambda-1}, R_{t+1}, OF_{t+1}) = b\mathbf{E}_{\zeta_{t+1}} [\zeta_{t+1} - x_{t+1} - w_{t+1}^0]^+ + h\mathbf{E}_{\zeta_{t+1}} [x_{t+1} + w_{t+1}^0 - \zeta_{t+1}]^+ \\ + \mathbf{E}_{OF_t | OF_{t+1}} \mathbf{E}_{\zeta_{t+1}} G_t^\lambda(x_{t+1} + w_{t+1}^0 - \zeta_{t+1}, \dots, w_{t+1}^{\lambda-1}, 0, R_{t+1} - c\zeta_{t+1} + OF_{t+1} - OF_t, OF_t)$$

and

$$NV_{t+1}^\lambda(x_{t+1}, w_{t+1}^0, \dots, w_{t+1}^{\lambda-1}) = b\mathbf{E}_{\zeta_{t+1}} [\zeta_{t+1} - x_{t+1} - w_{t+1}^0]^+ + h\mathbf{E}_{\zeta_{t+1}} [x_{t+1} + w_{t+1}^0 - \zeta_{t+1}]^+ \\ + \mathbf{E}_{\zeta_{t+1}} NV_t^\lambda(x_{t+1} + w_{t+1}^0 - \zeta_{t+1}, w_{t+1}^1, \dots, w_{t+1}^{\lambda-1}, 0)$$

Since  $\frac{\partial NV_t^\lambda(\cdot)}{\partial x_t} = \frac{\partial G_t^\lambda(\cdot, R_t, OF_t)}{\partial x_t}$  and  $\frac{\partial NV_t^\lambda(\cdot)}{\partial w_t^i} = \frac{\partial G_t^\lambda(\cdot, R_t, OF_t)}{\partial w_t^i}$  for  $i = 1, 2, \dots, \lambda - 1$ , it follows that, for fixed  $(R_{t+1}, OF_{t+1})$ ,  $\frac{\partial NV_{t+1}^\lambda(\cdot)}{\partial x_{t+1}} = \frac{\partial G_{t+1}^\lambda(\cdot, R_{t+1}, OF_{t+1})}{\partial x_{t+1}}$  and  $\frac{\partial NV_{t+1}^\lambda(\cdot)}{\partial w_{t+1}^i} = \frac{\partial G_{t+1}^\lambda(\cdot, R_{t+1}, OF_{t+1})}{\partial w_{t+1}^i} \forall i = 0, 1, \dots, \lambda - 1$ .

Case 2.2:  $IP_{t+1} < y_{t+1}^{\lambda*}$ ,  $\frac{R_{t+1}}{c} \geq y_{t+1}^{\lambda*}$ .

$$G_{t+1}^{\lambda}(x_{t+1}, w_{t+1}^0, \dots, w_{t+1}^{\lambda-1}, R_{t+1}, OF_{t+1}) = c(y_{t+1}^{\lambda*} - IP_{t+1}) + bE_{\zeta_{t+1}}[\zeta_{t+1} - x_{t+1} - w_{t+1}^0]^+ + hE_{\zeta_{t+1}}[x_{t+1} + w_{t+1}^0 - \zeta_{t+1}]^+ \\ + E_{OF_t|OF_{t+1}}E_{\zeta_{t+1}}G_t^{\lambda}(x_{t+1} + w_{t+1}^0 - \zeta_{t+1}, \dots, w_{t+1}^{\lambda-1}, y_{t+1}^{\lambda*} - IP_{t+1}, R_{t+1} - c\zeta_{t+1} + OF_{t+1} - OF_t, OF_t)$$

and

$$NV_{t+1}^{\lambda}(x_{t+1}, w_{t+1}^0, \dots, w_{t+1}^{\lambda-1}) = c(y_{t+1}^{\lambda*} - IP_{t+1}) + bE_{\zeta_{t+1}}[\zeta_{t+1} - x_{t+1} - w_{t+1}^0]^+ + hE_{\zeta_{t+1}}[x_{t+1} + w_{t+1}^0 - \zeta_{t+1}]^+ \\ + E_{\zeta_{t+1}}NV_t^{\lambda}(x_{t+1} + w_{t+1}^0 - \zeta_{t+1}, w_{t+1}^1, \dots, w_{t+1}^{\lambda-1}, y_{t+1}^{\lambda*} - IP_{t+1})$$

Again, the induction hypothesis concerning the derivatives of  $NV_t^{\lambda}$  and  $G_t^{\lambda}$  directly yields

$$\frac{\partial NV_{t+1}^{\lambda}(\cdot)}{\partial x_{t+1}} = \frac{\partial G_{t+1}^{\lambda}(\cdot, R_{t+1}, OF_{t+1})}{\partial x_{t+1}} \quad \text{and} \quad \frac{\partial NV_{t+1}^{\lambda}(\cdot)}{\partial w_{t+1}^i} = \frac{\partial G_{t+1}^{\lambda}(\cdot, R_{t+1}, OF_{t+1})}{\partial w_{t+1}^i} \quad \forall i = 0, 1, \dots, \lambda - 1.$$

Case 2.3:  $\frac{R_{t+1}}{c} < y_{t+1}^{\lambda*}$

$$NV_{t+1}^{\lambda}(x_{t+1}, w_{t+1}^0, \dots, w_{t+1}^{\lambda-1}) = c(y_{t+1}^{\lambda*} - IP_{t+1}) \\ + bE_{\zeta_{t+1}}[\zeta_{t+1} - x_{t+1} - w_{t+1}^0]^+ + hE_{\zeta_{t+1}}[x_{t+1} + w_{t+1}^0 - \zeta_{t+1}]^+ + E_{\zeta_{t+1}}NV_t^{\lambda}(x_{t+1} + w_{t+1}^0 - \zeta_{t+1}, \dots, w_{t+1}^{\lambda-1}, y_{t+1}^{\lambda*} - IP_{t+1})$$

From equation (15), we get

$$NV_t^{\lambda}(x_{t+1} + w_{t+1}^0 - \zeta_{t+1}, w_{t+1}^1, \dots, w_{t+1}^{\lambda-1}, y_{t+1}^{\lambda*} - IP_{t+1}) = c(\max(y_t^{\lambda*} - (y_{t+1}^{\lambda*} - \zeta_{t+1}), 0)) + \tilde{f}_t(x_{t+1} + w_{t+1}^0 + w_{t+1}^1 - \zeta_{t+1}) \\ + E_{\zeta_t}\tilde{f}_{t-1}(x_{t+1} + w_{t+1}^0 + w_{t+1}^1 + w_{t+1}^2 - \zeta_{t+1} - \zeta_t) + \dots + E_{\zeta_t, \dots, \zeta_{t-\lambda+2}}\tilde{f}_{t-\lambda+1}(y_{t+1}^{\lambda*} - \zeta_{t+1} - \zeta_t - \dots - \zeta_{t-\lambda+2}) \\ + E_{\zeta_t, \dots, \zeta_{t-\lambda+1}}NV_{t-\lambda}^{\lambda}(x_{t-\lambda}, w_{t-\lambda}^0, \dots, w_{t-\lambda}^{\lambda-1}) \quad (16)$$

In equation (16),  $x_{t-\lambda} = y_{t+1}^{\lambda*} - \zeta_{t+1} - \zeta_t - \dots - \zeta_{t-\lambda+1}$ , i.e., it is a function only of  $y_{t+1}^{\lambda*}$ ,  $\zeta_{t+1}$ ,  $\zeta_t$ ,  $\dots$ ,  $\zeta_{t-\lambda+1}$ .  $w_{t-\lambda}^0$ , which is the order placed in  $t$  equals  $\max(y_t^{\lambda*} - (y_{t+1}^{\lambda*} - \zeta_{t+1}), 0)$ , i.e., it is a function only of  $y_{t+1}^{\lambda*}$ ,  $y_t^{\lambda*}$ , and  $\zeta_{t+1}$ . Following similar logic, it is easy to see that the state variables  $(x_{t-\lambda}, w_{t-\lambda}^0, \dots, w_{t-\lambda}^{\lambda-1})$  are independent of  $(x_{t+1}, w_{t+1}^0, \dots, w_{t+1}^{\lambda-1})$ .

$$G_{t+1}^{\lambda}(x_{t+1}, w_{t+1}^0, \dots, w_{t+1}^{\lambda-1}, R_{t+1}, OF_{t+1}) = R_{t+1} - cIP_{t+1} + bE_{\zeta_{t+1}}[\zeta_{t+1} - x_{t+1} - w_{t+1}^0]^+ + hE_{\zeta_{t+1}}[x_{t+1} + w_{t+1}^0 - \zeta_{t+1}]^+ \\ + E_{OF_t|OF_{t+1}}E_{\zeta_{t+1}}G_t^{\lambda}(x_{t+1} + w_{t+1}^0 - \zeta_{t+1}, \dots, w_{t+1}^{\lambda-1}, \frac{R_{t+1}}{c} - IP_{t+1}, R_{t+1} - c\zeta_{t+1} + OF_{t+1} - OF_t, OF_t)$$

Since the derivatives of  $G_t^{\lambda}$  and  $NV_t^{\lambda}$  are equal (for a given  $R_t$  and  $OF_t$ ) by the induction hypothesis, to analyze the derivative of  $G_t^{\lambda}(x_{t+1} + w_{t+1}^0 - \zeta_{t+1}, \dots, w_{t+1}^{\lambda-1}, \frac{R_{t+1}}{c} - IP_{t+1}, R_{t+1} - c\zeta_{t+1} + OF_{t+1} - OF_t, OF_t)$  with respect to state variables  $x_{t+1}, w_{t+1}^0, \dots, w_{t+1}^{\lambda-1}$ , we focus on the following expression.

$$NV_t^{\lambda}(x_{t+1} + w_{t+1}^0 - \zeta_{t+1}, w_{t+1}^1, \dots, w_{t+1}^{\lambda-1}, \frac{R_{t+1}}{c} - IP_{t+1}) = c(\max(y_t^{\lambda*} - (\frac{R_{t+1}}{c} - \zeta_{t+1}), 0)) + \tilde{f}_t(x_{t+1} + w_{t+1}^0 + w_{t+1}^1 - \zeta_{t+1}) \\ + E_{\zeta_t}\tilde{f}_{t-1}(x_{t+1} + w_{t+1}^0 + w_{t+1}^1 + w_{t+1}^2 - \zeta_{t+1} - \zeta_t) + \dots + E_{\zeta_t, \dots, \zeta_{t-\lambda+2}}\tilde{f}_{t-\lambda+1}(\frac{R_{t+1}}{c} - \zeta_{t+1} - \zeta_t - \dots - \zeta_{t-\lambda+2}) \\ + E_{\zeta_t, \dots, \zeta_{t-\lambda+1}}NV_{t-\lambda}^{\lambda}(x_{t-\lambda}, w_{t-\lambda}^1, \dots, w_{t-\lambda}^{\lambda-1}) \quad (17)$$

In equation (17),  $x_{t-\lambda} = \frac{R_{t+1}}{c} - \zeta_{t+1} - \zeta_t - \dots - \zeta_{t-\lambda+1}$ , i.e., it is a function only of  $\frac{R_{t+1}}{c}$ ,  $\zeta_{t+1}$ ,  $\zeta_t$ ,  $\dots$ ,  $\zeta_{t-\lambda+1}$ .  $w_{t-\lambda}^0 = \max(y_t^{\lambda*} - (\frac{R_{t+1}}{c} - \zeta_{t+1}), 0)$  is a function only of  $\frac{R_{t+1}}{c}$ ,  $y_t^{\lambda*}$  and  $\zeta_{t+1}$ . Using similar logic, we see that for a given  $R_{t+1}$ , the state variables  $(x_{t-\lambda}, w_{t-\lambda}^0, \dots, w_{t-\lambda}^{\lambda-1})$  are independent of  $(x_{t+1}, w_{t+1}^0, \dots, w_{t+1}^{\lambda-1})$  in this case as well. Therefore it follows that the derivatives of  $NV_t^{\lambda}(x_{t+1} + w_{t+1}^0 - \zeta_{t+1}, w_{t+1}^1, \dots, w_{t+1}^{\lambda-1}, y_{t+1}^{\lambda*} - IP_{t+1})$  and  $NV_t^{\lambda}(x_{t+1} + w_{t+1}^0 - \zeta_{t+1}, w_{t+1}^1, \dots, w_{t+1}^{\lambda-1}, \frac{R_{t+1}}{c} - IP_{t+1})$  with respect to  $x_{t+1}$  and  $w_{t+1}^i$ ,  $i = 0, 1, \dots, \lambda - 1$  are equal. This in turn implies that  $\frac{\partial NV_{t+1}^{\lambda}(\cdot)}{\partial x_{t+1}} = \frac{\partial G_{t+1}^{\lambda}(\cdot, R_{t+1}, OF_{t+1})}{\partial x_{t+1}}$  and  $\frac{\partial NV_{t+1}^{\lambda}(\cdot)}{\partial w_{t+1}^i} = \frac{\partial G_{t+1}^{\lambda}(\cdot, R_{t+1}, OF_{t+1})}{\partial w_{t+1}^i}$  for any given  $(R_{t+1}, OF_{t+1})$  and  $i = 0, 1, \dots, \lambda - 1$ . Hence the induction is complete.

### Proof of Theorem 2

We use a sample path approach to prove this result. For expositional clarity, let us define a new variable  $\bar{Z}_t^n = (\bar{z}_1^n, \bar{z}_2^n, \dots, \bar{z}_{t-1}^n)$ ,  $n=1,2$ , where  $\bar{z}_i^n$  is the amount received in period  $i$  under funding scenario  $n$ , given that  $OF_t^n=j$ . Of course,  $\bar{Z}_t^1$  and  $\bar{Z}_t^2$  are different for different sample paths. Let  $\zeta = (\zeta_1, \zeta_2, \dots, \zeta_t)$  be the vector of realized demands in periods  $1, 2, \dots, t$  along a particular sample path. Given  $\zeta$  and  $\bar{Z}_t^n$ , let  $G_{t,\zeta,\bar{Z}_t^n}^{\lambda,n}(x_t, w_t^0, \dots, w_t^{\lambda-1}, R_t, j)$  be the cost incurred in periods  $1, 2, \dots, t$  along a particular sample path under funding scenario  $n$ , following the optimal replenishment policy specified in (1). If random variables  $\zeta$ ,  $\bar{Z}_t^1$ ,  $\bar{Z}_t^2$ ,  $\{OF_{t'}^1, t' = 1, 2, \dots, t-1\}$  and  $\{OF_{t'}^2, t' = 1, 2, \dots, t-1\}$  are defined on the same probability space, then given that  $OF_t^1 = OF_t^2 = j$ ,  $\text{Probability}(OF_{t'}^2 \geq OF_{t'}^1) = 1 \forall t' = 1, 2, \dots, t-1$ . This follows from condition (2). Also, from condition (3), we have that  $\text{Probability}(OF_{t'}^{n-1} | OF_{t'}^n = i' \geq OF_{t'-1}^n | OF_{t'}^n = i) = 1$  for  $i' > i$ ,  $t' = 2, 3, \dots, t-1$  and  $n=1, 2$ . Combined, they imply that  $\sum_{j=t-1-i}^{t-1} \bar{z}_j^1 \geq \sum_{j=t-1-i}^{t-1} \bar{z}_j^2$  w.p. 1  $\forall i = 0, 1, \dots, t-2$ . Therefore, every replenishment decision feasible under scenario 2 is also feasible under scenario 1 along every sample path. Hence,  $G_{t,\zeta,\bar{Z}_t^2}^{\lambda,2}(x_t, w_t^0, \dots, w_t^{\lambda-1}, R_t, j) \geq G_{t,\zeta,\bar{Z}_t^1}^{\lambda,1}(x_t, w_t^0, \dots, w_t^{\lambda-1}, R_t, j)$  w.p.1. Since, this result holds for every sample path, the result also holds in expectation, i.e.,  $G_t^{\lambda,2}(x_t, w_t^0, \dots, w_t^{\lambda-1}, R_t, j) \geq G_t^{\lambda,1}(x_t, w_t^0, \dots, w_t^{\lambda-1}, R_t, j)$ .

### Proof of Theorem 3

The proof proceeds through induction. We use an equivalent value function  $\hat{G}_t^\lambda$  instead of  $G_t^\lambda$  in the proof. Define a new state variable  $TF_t = R_t + OF_t$  and let

$$\begin{aligned} & \hat{G}_t^\lambda(x_t, w_t^0, w_t^1, \dots, w_t^{\lambda-1}, R_t, TF_t) \\ &= \min_{0 \leq z \leq \frac{r_t}{c}} \left\{ cz + bE_{\zeta_t}[\zeta_t - x_t - w_t^0]^+ + hE_{\zeta_t}[x_t + w_t^0 - \zeta_t]^+ \right. \\ & \quad \left. + E_{OF_{t-1}|OF_t} E_{\zeta_t} \hat{G}_{t-1}^\lambda(x_t + w_t^0 - \zeta_t, w_t^1, \dots, w_t^{\lambda-1}, z, R_t - c\zeta_t + (OF_t - OF_{t-1}), TF_t - c\zeta_t) \right\} \\ &= \min_{0 \leq z \leq \frac{r_t}{c}} \left\{ cz + bE_{\zeta_t}[\zeta_t - x_t - w_t^0]^+ + hE_{\zeta_t}[x_t + w_t^0 - \zeta_t]^+ \right. \\ & \quad \left. + E_{(OF_t - OF_{t-1})|OF_t} E_{\zeta_t} \hat{G}_{t-1}^\lambda(x_t + w_t^0 - \zeta_t, w_t^1, \dots, w_t^{\lambda-1}, z, R_t - c\zeta_t + (OF_t - OF_{t-1}), TF_t - c\zeta_t) \right\} \end{aligned}$$

The terminal condition is  $\hat{G}_0^\lambda(x_0, w_0^0, w_0^1, \dots, w_0^{\lambda-1}, R_0, TF_0) = 0$ . Clearly,  $\hat{G}_0^\lambda$  is jointly convex in  $x_0, w_0^0, \dots, w_0^{\lambda-1}, R_0$  and  $TF_0$ . For  $t \leq \lambda$ , it is not optimal to order in period  $t$  and hence, from expression (10), we see that  $\hat{G}_t^\lambda$  is jointly convex in  $x_t, w_t^0, \dots, w_t^{\lambda-1}, R_t$  and  $TF_t$ . Now,

$$\begin{aligned} & \hat{G}_{\lambda+1}^\lambda(x_{\lambda+1}, w_{\lambda+1}^0, \dots, w_{\lambda+1}^{\lambda-1}, R_{\lambda+1}, TF_{\lambda+1}) \\ &= \min_{0 \leq z \leq \frac{r_t}{c}} \left\{ cz + bE_{\zeta_{\lambda+1}}[\zeta_{\lambda+1} - x_{\lambda+1} - w_{\lambda+1}^0]^+ + hE_{\zeta_{\lambda+1}}[x_{\lambda+1} + w_{\lambda+1}^0 - \zeta_{\lambda+1}]^+ \right. \\ & \quad \left. + E_{(OF_{\lambda+1} - OF_\lambda)|OF_{\lambda+1}} E_{\zeta_{\lambda+1}} \hat{G}_\lambda^\lambda(x_{\lambda+1} + w_{\lambda+1}^0 - \zeta_{\lambda+1}, \dots, w_{\lambda+1}^{\lambda-1}, z, R_{\lambda+1} - c\zeta_{\lambda+1} + (OF_{\lambda+1} - OF_\lambda), TF_{\lambda+1} - c\zeta_{\lambda+1}) \right\} \end{aligned}$$

Pick any  $(\bar{x}_{\lambda+1}, \bar{w}_{\lambda+1}^0, \dots, \bar{w}_{\lambda+1}^{\lambda-1}, \bar{R}_{\lambda+1}, \bar{TF}_{\lambda+1})$ ,  $(\bar{\bar{x}}_{\lambda+1}, \bar{\bar{w}}_{\lambda+1}^0, \dots, \bar{\bar{w}}_{\lambda+1}^{\lambda-1}, \bar{\bar{R}}_{\lambda+1}, \bar{\bar{TF}}_{\lambda+1})$ ,  $\bar{z}$ ,  $\bar{\bar{z}}$  and  $0 \leq \bar{\lambda} \leq 1$ . Define  $\hat{x}_{\lambda+1} = \bar{\lambda}\bar{x}_{\lambda+1} + (1 - \bar{\lambda})\bar{\bar{x}}_{\lambda+1}$  and define  $\hat{w}_{\lambda+1}^0, \hat{w}_{\lambda+1}^1, \dots$  etc. similarly. Now, for fixed  $\zeta_{\lambda+1}$ ,

$$\begin{aligned} & \hat{G}_\lambda^\lambda(\hat{x}_{\lambda+1} + \hat{w}_{\lambda+1}^0 - \zeta_{\lambda+1}, \dots, \hat{w}_{\lambda+1}^{\lambda-1}, \hat{z}, \hat{R}_{\lambda+1} - c\zeta_{\lambda+1} + \hat{OF}_{\lambda+1} - (OF_\lambda | \hat{OF}_{\lambda+1}), \hat{TF}_{\lambda+1} - c\zeta_{\lambda+1}) \\ & \leq \hat{G}_\lambda^\lambda(\hat{x}_{\lambda+1} + \hat{w}_{\lambda+1}^0 - \zeta_{\lambda+1}, \dots, \hat{w}_{\lambda+1}^{\lambda-1}, \hat{z}, \hat{R}_{\lambda+1} - c\zeta_{\lambda+1} + \hat{OF}_{\lambda+1} - \bar{\lambda}(OF_\lambda | \bar{OF}_{\lambda+1}) - (1 - \bar{\lambda})(OF_\lambda | \bar{\bar{OF}}_{\lambda+1}), \hat{TF}_{\lambda+1} - c\zeta_{\lambda+1}) \\ & \leq \bar{\lambda}\hat{G}_\lambda^\lambda(\bar{x}_{\lambda+1} + \bar{w}_{\lambda+1}^0 - \zeta_{\lambda+1}, \dots, \bar{w}_{\lambda+1}^{\lambda-1}, \bar{z}, \bar{R}_{\lambda+1} - c\zeta_{\lambda+1} + \bar{OF}_{\lambda+1} - (OF_\lambda | \bar{OF}_{\lambda+1}), \bar{TF}_{\lambda+1} - c\zeta_{\lambda+1}) \\ & \quad + (1 - \bar{\lambda})\hat{G}_\lambda^\lambda(\bar{\bar{x}}_{\lambda+1} + \bar{\bar{w}}_{\lambda+1}^0 - \zeta_{\lambda+1}, \dots, \bar{\bar{w}}_{\lambda+1}^{\lambda-1}, \bar{\bar{z}}, \bar{\bar{R}}_{\lambda+1} - c\zeta_{\lambda+1} + \bar{\bar{OF}}_{\lambda+1} - (OF_\lambda | \bar{\bar{OF}}_{\lambda+1}), \bar{\bar{TF}}_{\lambda+1} - c\zeta_{\lambda+1}) \end{aligned}$$

with probability 1. The first inequality is obtained by combining conditions (3) and (5) and the second inequality follows from the convexity of  $\hat{G}_\lambda^\lambda$  in  $x_\lambda, w_\lambda^0, \dots, w_\lambda^{\lambda-1}, R_\lambda$  and  $TF_\lambda$ . Therefore, it follows that the function to be minimized in the expression for  $\hat{G}_{\lambda+1}^\lambda$  is jointly convex in  $x_{\lambda+1}, w_{\lambda+1}^0, \dots, w_{\lambda+1}^{\lambda-1}, R_{\lambda+1}, TF_{\lambda+1}$  and  $z$ . Then, using proposition B-4 from Heyman and Sobel (1984), we see that  $\hat{G}_{\lambda+1}^\lambda$  is jointly convex in  $x_{\lambda+1}, w_{\lambda+1}^0, \dots, w_{\lambda+1}^{\lambda-1}, R_{\lambda+1}$  and  $TF_{\lambda+1}$ . A similar induction argument can be used to demonstrate that  $\hat{G}_t^\lambda$  is jointly convex in  $x_t, w_t^0, \dots, w_t^{\lambda-1}, R_t$  and  $TF_t$  for a general  $t$ .

Now, we make use of the convex ordering of the funding received in any given period under the two funding scenarios. To begin with, since no orders are placed in periods  $t \leq \lambda$ ,  $\hat{G}_t^{\lambda,1}(x_t, w_t^0, w_t^1, \dots, w_t^{\lambda-1}, R_t, TF_t) = \hat{G}_t^{\lambda,2}(x_t, w_t^0, w_t^1, \dots, w_t^{\lambda-1}, R_t, TF_t)$  for  $t \leq \lambda$ . Now,

$$\begin{aligned} & \hat{G}_{\lambda+1}^{\lambda,1}(x_{\lambda+1}, w_{\lambda+1}^0, \dots, w_{\lambda+1}^{\lambda-1}, R_{\lambda+1}, TF_{\lambda+1}) \\ &= \min_{0 \leq z \leq \frac{r_t}{c}} \left\{ cz + b\mathbf{E}_{\zeta_{\lambda+1}}[\zeta_{\lambda+1} - x_{\lambda+1} - w_{\lambda+1}^0]^+ + h\mathbf{E}_{\zeta_{\lambda+1}}[x_{\lambda+1} + w_{\lambda+1}^0 - \zeta_{\lambda+1}]^+ \right. \\ & \quad \left. + \mathbf{E}_{(OF_{\lambda+1} - OF_\lambda^1) | OF_{\lambda+1}} \mathbf{E}_{\zeta_{\lambda+1}} \hat{G}_\lambda^{\lambda,1}(x_{\lambda+1} + w_{\lambda+1}^0 - \zeta_{\lambda+1}, \dots, w_{\lambda+1}^{\lambda-1}, z, R_{\lambda+1} - c\zeta_{\lambda+1} + (OF_{\lambda+1} - OF_\lambda^1), TF_{\lambda+1} - c\zeta_{\lambda+1}) \right\} \\ &= \min_{0 \leq z \leq \frac{r_t}{c}} \left\{ cz + b\mathbf{E}_{\zeta_{\lambda+1}}[\zeta_{\lambda+1} - x_{\lambda+1} - w_{\lambda+1}^0]^+ + h\mathbf{E}_{\zeta_{\lambda+1}}[x_{\lambda+1} + w_{\lambda+1}^0 - \zeta_{\lambda+1}]^+ \right. \\ & \quad \left. + \mathbf{E}_{(OF_{\lambda+1} - OF_\lambda^2) | OF_{\lambda+1}} \mathbf{E}_{\zeta_{\lambda+1}} \hat{G}_\lambda^{\lambda,2}(x_{\lambda+1} + w_{\lambda+1}^0 - \zeta_{\lambda+1}, \dots, w_{\lambda+1}^{\lambda-1}, z, R_{\lambda+1} - c\zeta_{\lambda+1} + (OF_{\lambda+1} - OF_\lambda^2), TF_{\lambda+1} - c\zeta_{\lambda+1}) \right\} \\ &\leq \min_{0 \leq z \leq \frac{r_t}{c}} \left\{ cz + b\mathbf{E}_{\zeta_{\lambda+1}}[\zeta_{\lambda+1} - x_{\lambda+1} - w_{\lambda+1}^0]^+ + h\mathbf{E}_{\zeta_{\lambda+1}}[x_{\lambda+1} + w_{\lambda+1}^0 - \zeta_{\lambda+1}]^+ \right. \\ & \quad \left. + \mathbf{E}_{(OF_{\lambda+1} - OF_\lambda^2) | OF_{\lambda+1}} \mathbf{E}_{\zeta_{\lambda+1}} \hat{G}_\lambda^{\lambda,2}(x_{\lambda+1} + w_{\lambda+1}^0 - \zeta_{\lambda+1}, \dots, w_{\lambda+1}^{\lambda-1}, z, R_{\lambda+1} - c\zeta_{\lambda+1} + (OF_{\lambda+1} - OF_\lambda^2), TF_{\lambda+1} - c\zeta_{\lambda+1}) \right\} \\ &= \hat{G}_{\lambda+1}^{\lambda,2}(x_{\lambda+1}, w_{\lambda+1}^0, \dots, w_{\lambda+1}^{\lambda-1}, R_{\lambda+1}, TF_{\lambda+1}) \end{aligned}$$

In the above, the first equality is by definition, the second equality follows from the fact that  $\hat{G}_\lambda^{\lambda,1} = \hat{G}_\lambda^{\lambda,2}$ , and the inequality follows from the convex ordering  $(OF_t - OF_{t-1}^2) | OF_t \geq_{cvx} (OF_t - OF_{t-1}^1) | OF_t$  and the convexity of  $\hat{G}_\lambda^\lambda$  in  $R_\lambda$ . Thus,  $\hat{G}_{\lambda+1}^{\lambda,2} \geq \hat{G}_{\lambda+1}^{\lambda,1}$ . Using an induction argument identical to the one used above, it is easy to show that  $\hat{G}_t^{\lambda,2} \geq \hat{G}_t^{\lambda,1}$  for any general  $t$ .

## References

- Heyman, D.P., M.J. Sobel. 1984. Stochastic models in operations research, vol. II: stochastic optimization. McGraw-Hill, NY.
- Shaked, M., G. Shanthikumar. 2007. Stochastic orders. Springer, NY.
